# Supplementary material for: A metal–organic framework gel with Cd2+ derived from only coordination bonds without intermolecular interactions and its catalytic ability
Source: Royal Society of Chemistry journal article supplement (doi:10.1039/c3nj00164d), 2013-01-01
Supplement: c3nj00164d.pdf [file c3nj00164d.pdf]

Supplementary Material (ESI) for New Journal of Chemistry

## **Electronic Supplementary Information (ESI)**

### **Metal-organic framework gel with Cd<sup>2+</sup> derived from only coordination bonds without intermolecular interactions and its catalytic ability**

**Hyo hee Lee, Sung Ho Jung, Sunhong Park, Ki-Min Park and Jong Hwa Jung<sup>\*a</sup>**

Department of Chemistry and Research Institute of Natural Science, Gyeongsang National University, Jinju 660-701 (Korea); E-mail: [jonghwa@gnu.ac.kr](mailto:jonghwa@gnu.ac.kr)

**Table S1.** Gelation test of ligand **1** with metal ions (3.0 equiv) in organic solvents.

| Entry | solvent                | ZnSO <sub>4</sub> | CdSO <sub>4</sub> | Cd(NO <sub>3</sub> ) <sub>2</sub> | Cd(ClO <sub>4</sub> ) <sub>2</sub> | CdBr <sub>2</sub> | CdCl <sub>2</sub> | CdI <sub>2</sub> |
|-------|------------------------|-------------------|-------------------|-----------------------------------|------------------------------------|-------------------|-------------------|------------------|
| 1     | MeOH                   | P                 | P                 | P                                 | P                                  | P                 | P                 | P                |
| 2     | DCM                    | P                 | P                 | P                                 | P                                  | P                 | P                 | P                |
| 3     | THF                    | P                 | P                 | P                                 | P                                  | P                 | P                 | P                |
| 4     | Toluene                | P                 | P                 | P                                 | P                                  | P                 | P                 | P                |
| 5     | AN                     | P                 | P                 | P                                 | P                                  | P                 | P                 | P                |
| 6     | EA                     | P                 | P                 | P                                 | P                                  | P                 | P                 | P                |
| 7     | CHCl <sub>3</sub>      | P                 | P                 | P                                 | P                                  | P                 | P                 | P                |
| 8     | Ethanol                | P                 | P                 | P                                 | P                                  | P                 | P                 | P                |
| 9     | H <sub>2</sub> O       | G                 | G                 | G                                 | G                                  | P                 | P                 | P                |
| 10    | DMF                    | S                 | S                 | S                                 | S                                  | S                 | S                 | S                |
| 11    | DMSO                   | S                 | S                 | S                                 | S                                  | S                 | S                 | S                |
| 12    | H <sub>2</sub> O: DMSO | P                 | P                 | P                                 | P                                  | P                 | P                 | P                |

P: precipitate, G: stable gel, S: solution

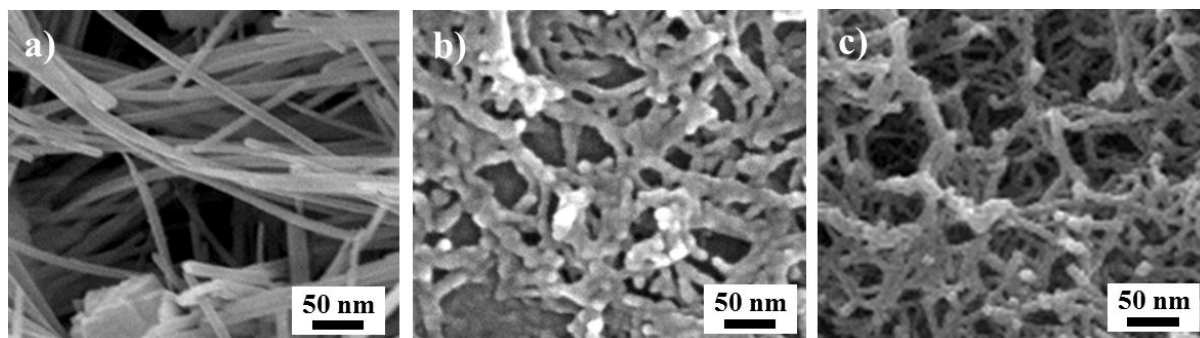

**Fig. S1** SEM images of Cd<sup>2+</sup> coordination polymer gel **1** with different anions; (a) CdSO<sub>4</sub>, (b) Cd(NO<sub>3</sub>)<sub>2</sub> and (c) Cd(ClO<sub>4</sub>)<sub>2</sub>.

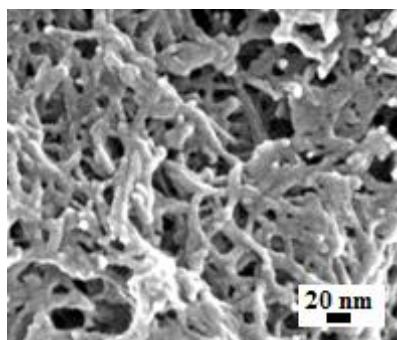

**Fig. S2** SEM images of Cd<sup>2+</sup> coordination polymer gel **1** with ZnSO<sub>4</sub>

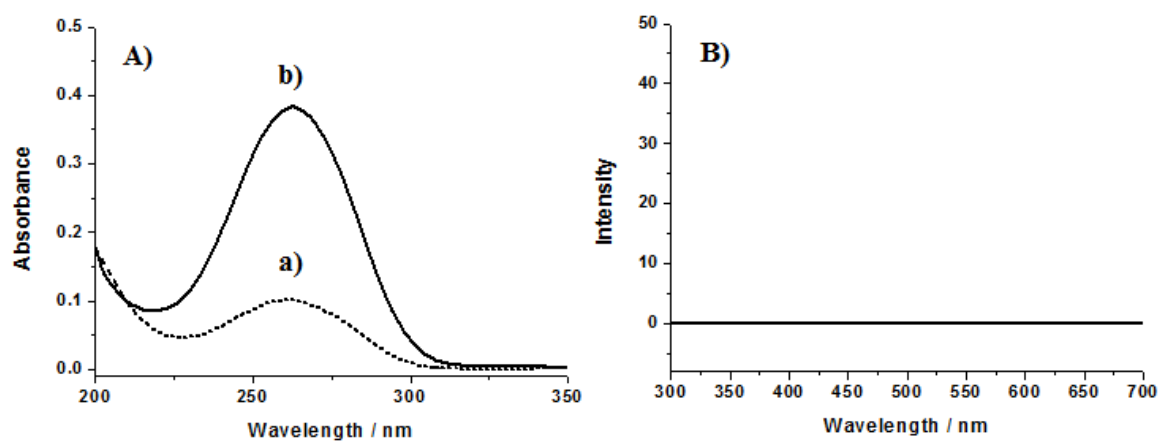

**Fig. S3** (A) UV-vis spectra of (a) sol **1** (0.01 mM ) and (b) coordination polymer gel **1** (0.01 mM ) with CdSO<sub>4</sub> (3.0 equiv) in H<sub>2</sub>O. (B) Fluorescence spectrum of coordination polymer gel **1** (0.01 mM ) with CdSO<sub>4</sub> (3.0 equiv) upon excitation at  $\lambda=262$  nm.

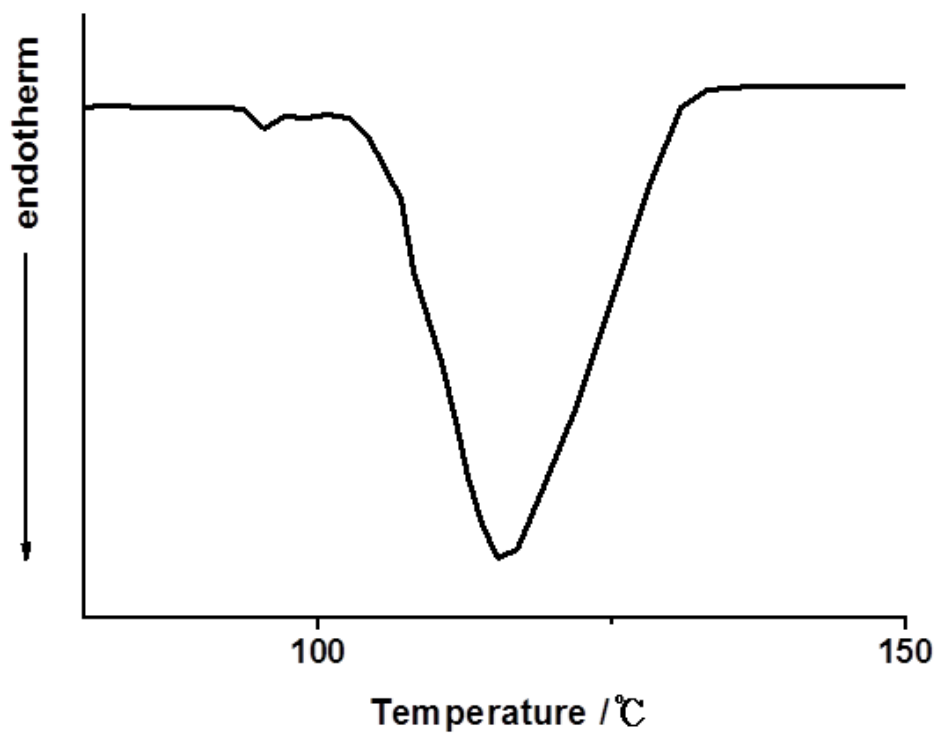

**Fig. S4** DSC thermogram of coordination polymer gel **1** with CdSO<sub>4</sub> (3.0 equiv) in H<sub>2</sub>O.

**Table S2.** Crystal and experimental data.

| <b>1a</b>                                  |                                                                                    |
|--------------------------------------------|------------------------------------------------------------------------------------|
| Formula                                    | C <sub>27</sub> H <sub>40</sub> Cd <sub>0.5</sub> N <sub>7</sub> O <sub>12</sub> S |
| Formula weight                             | 742.92                                                                             |
| Temperature (K)                            | 173(2)                                                                             |
| Crystal system                             | Monoclinic                                                                         |
| Space group                                | C2/c                                                                               |
| Z                                          | 8                                                                                  |
| F(000)                                     | 3096                                                                               |
| <i>a</i> (Å)                               | 15.7778(4)                                                                         |
| <i>b</i> (Å)                               | 14.6264(4)                                                                         |
| <i>c</i> (Å)                               | 29.5827(7)                                                                         |
| $\beta$ (°)                                | 97.5540(10)                                                                        |
| <i>V</i> (Å <sup>3</sup> )                 | 6767.6(3)                                                                          |
| <i>D</i> <sub>x</sub> (g/cm <sup>3</sup> ) | 1.458                                                                              |
| $2\theta_{\max}$ (°)                       | 53                                                                                 |
| <i>R</i>                                   | 0.0322                                                                             |
| <i>wR</i>                                  | 0.0845                                                                             |
| No. of reflection used [ $> 2\sigma(I)$ ]  | 29691                                                                              |
| Diffractometer                             | Bruker SMART CCD system                                                            |
| Structure determination                    | SHELXTL                                                                            |
| Refinement                                 | Full-matrix                                                                        |

**Table S3.** Selected bond lengths (Å) and bond angles (°) for **1**, {[Cd(H1)<sub>2</sub>(SO<sub>4</sub>)<sub>2</sub>].DMF·4H<sub>2</sub>O}<sub>n</sub>

|            |           |             |           |
|------------|-----------|-------------|-----------|
| Cd1-O4     | 2.277 (1) | Cd1-N2      | 2.330 (1) |
| Cd1-N6A    | 2.348(2)  |             |           |
| O4B-Cd1-O4 | 176.98(7) | O4B-Cd1-N2B | 92.45(5)  |
| O4-Cd1-N2B | 85.35(5)  | O4-Cd1-N2   | 92.44(5)  |
| N2B-Cd1-N2 | 86.41(8)  | O4B-Cd1-N6A | 96.34(5)  |
| O4-Cd1-N6A | 85.89(5)  | N2B-Cd1-N6A | 93.91(6)  |
| N2-Cd1-N6A | 178.27(5) |             |           |

Symmetry code: A)  $-x+1, y-1, -z+3/2$ ; B)  $-x+1, y, -z+3/2$
